# Supplementary material
Source: bioRxiv or medRxiv preprint supplement (https://medrxiv.org/highwire/filestream/84683/field_highwire_adjunct_files/0/2020.06.04.20122267-1.pdf)
Supplement: Supplementary file [file 2020.06.04.20122267-1.pdf]

## APPENDIX

### Biomarkers levels of anemia and iron metabolism in Coronavirus disease 2019: A systematic review and meta-analysis

**Supplemental figure S1.** Meta-analysis of mean hemoglobin levels in COVID-19 patients

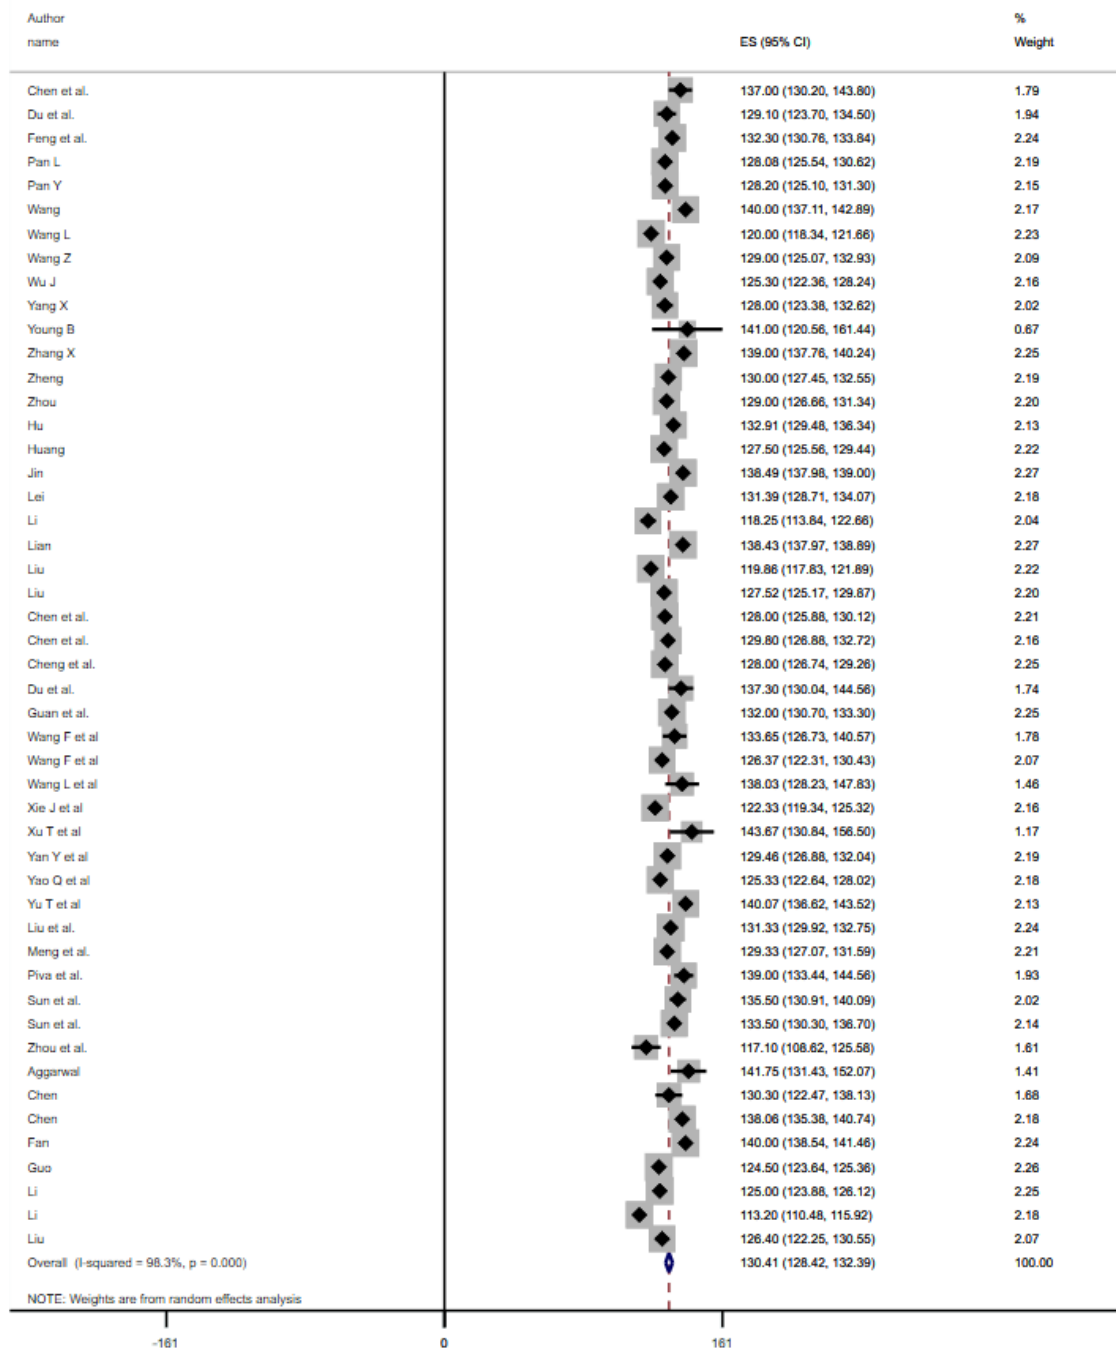

**Supplemental figure S2.** Meta-analysis of differences in mean hemoglobin(a) and ferritin (b) levels between severe and moderate COVID-19 patients

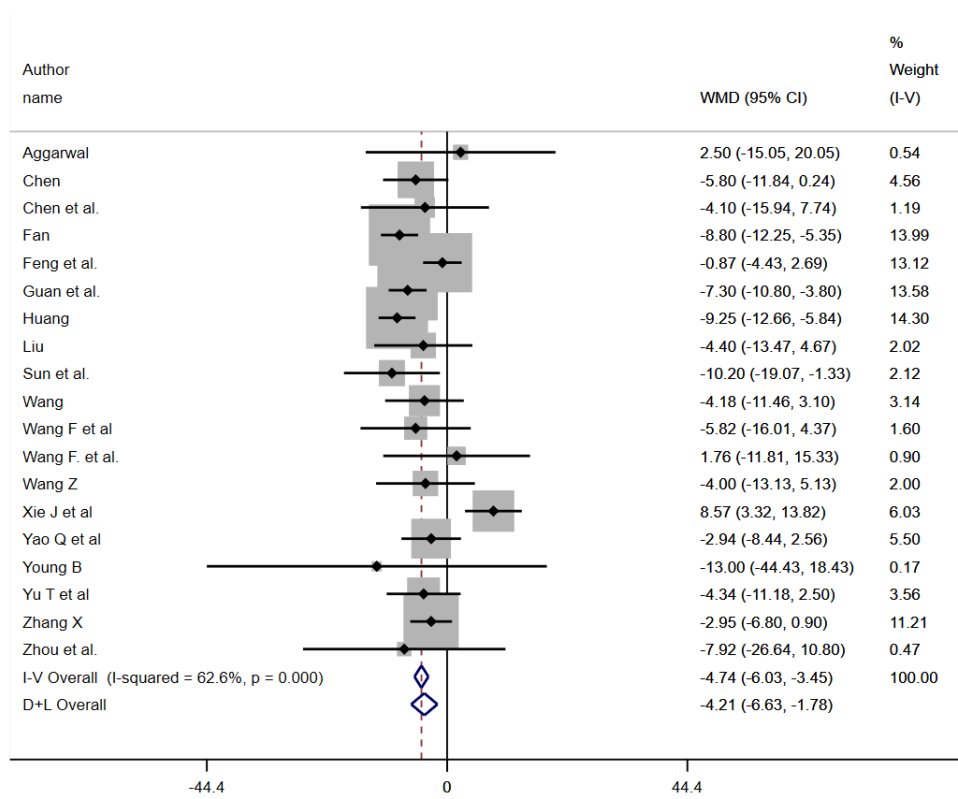

**a**

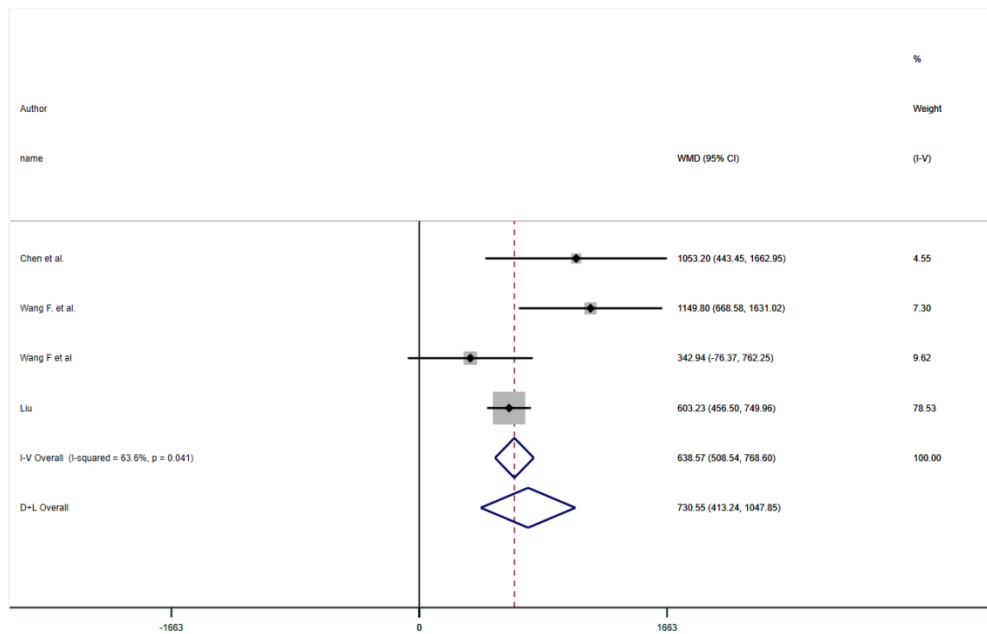

**b**

**Supplemental figure S3.** Meta-analysis of differences in mean hemoglobin (a) and ferritin (b) levels between deceased and COVID-19 patients who survived

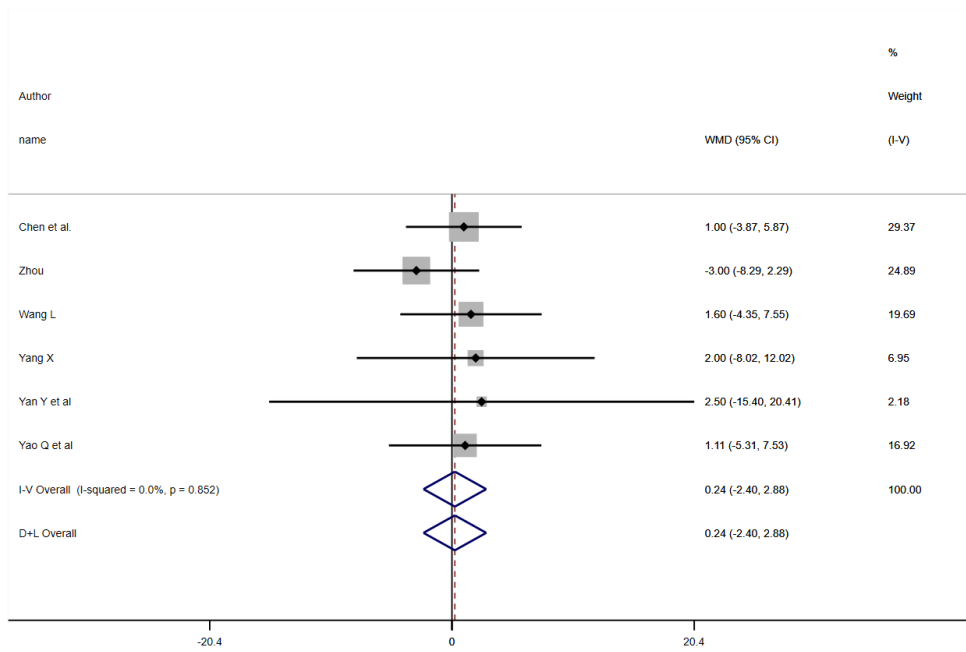

a

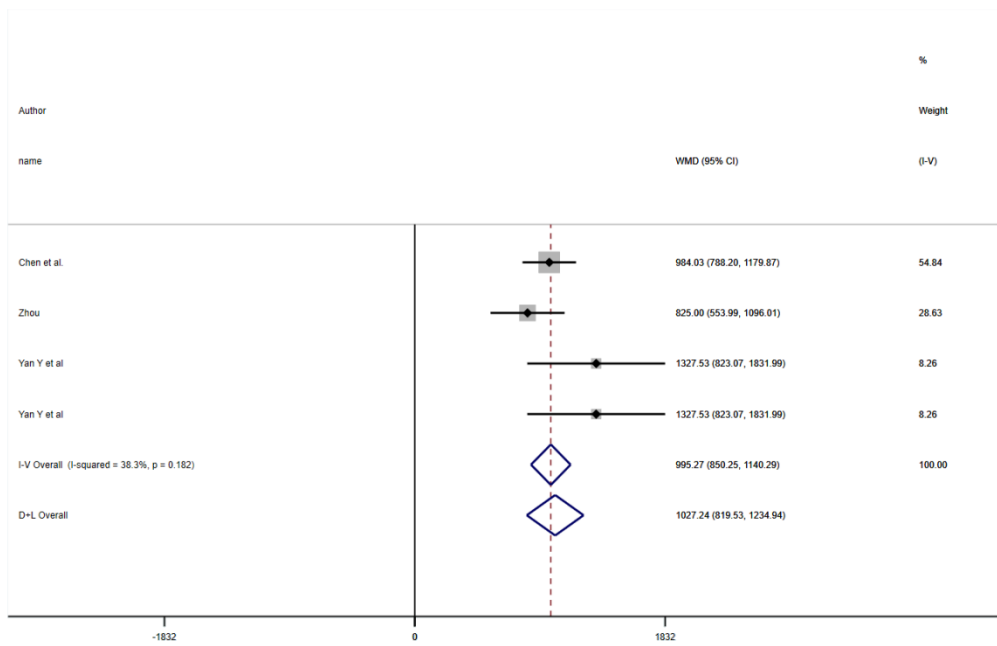

b

**Supplemental figure S4.** Meta-analysis of mean ferritine levels in COVID-19 adult and pediatric patients, and in adult only.

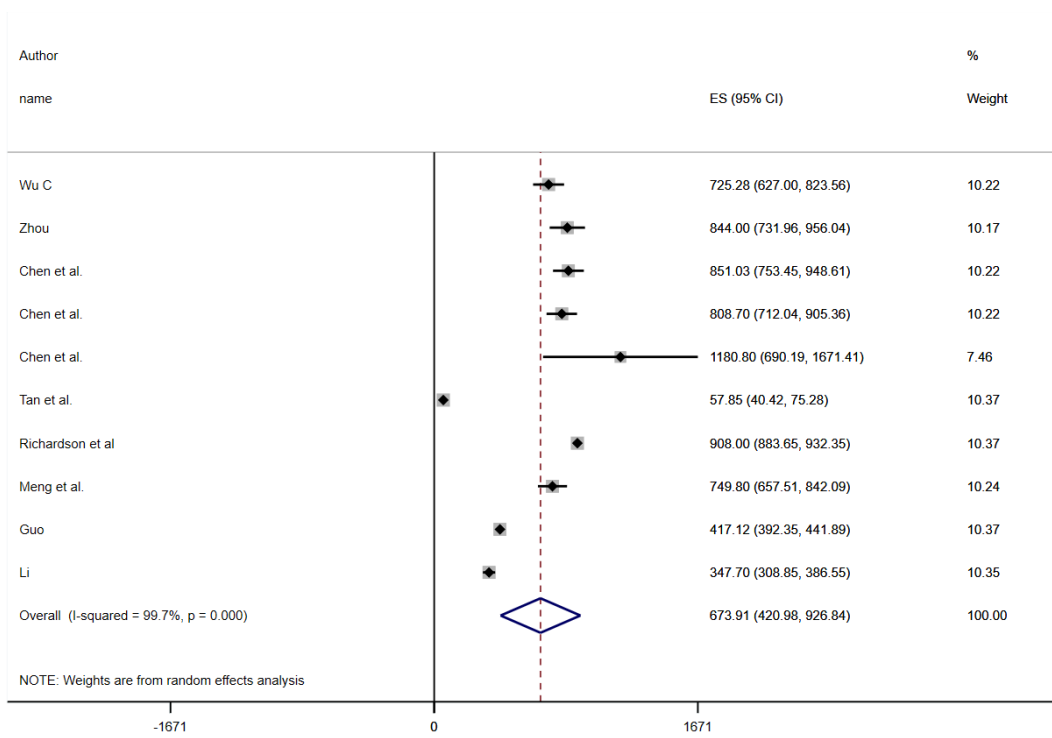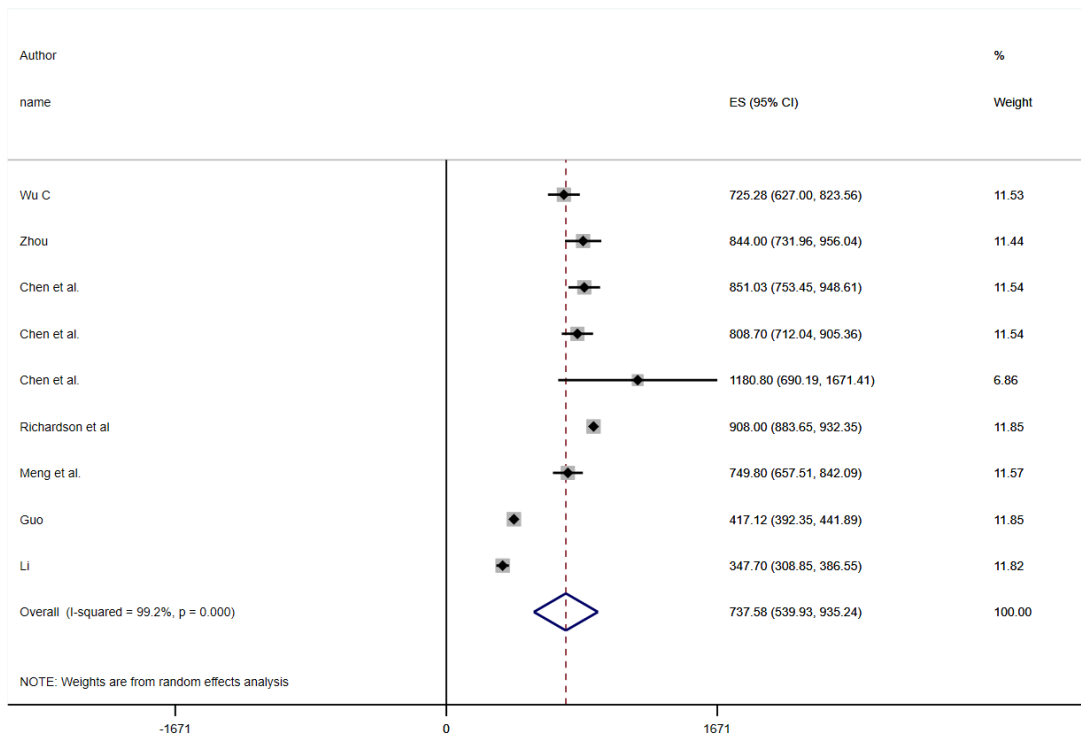

**Supplemental figure S5.** Bubble plots on mean hemoglobin levels by age, percentage of patients survived, percentage of male population, percentage of patients at intensive care, percentage of patients with cardiovascular diseases, hypertension and type 2 diabetes

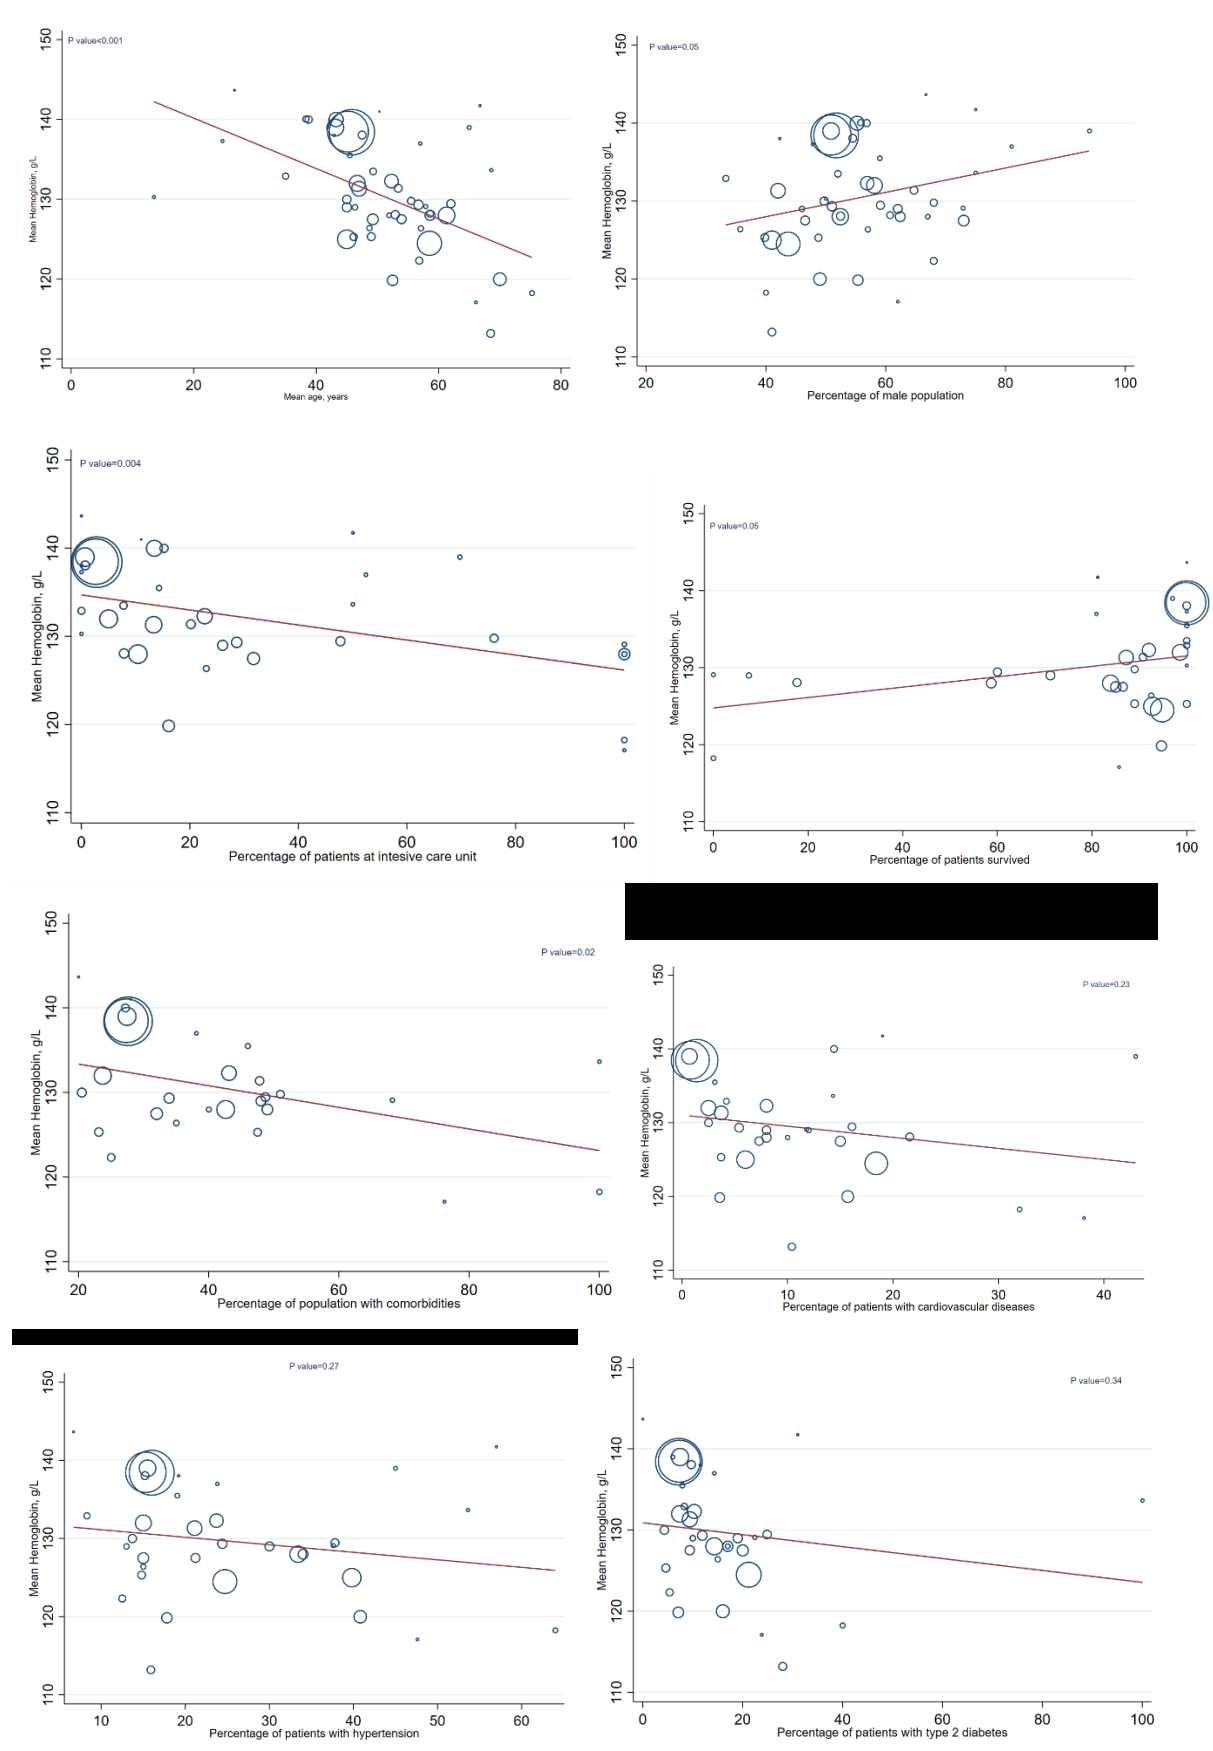

**Supplemental figure S6.** Bubble plots on weighted mean difference in hemoglobin levels between severe vs moderate Covid-19 cases by age, percentage of male population, percentage of patients at intensive care

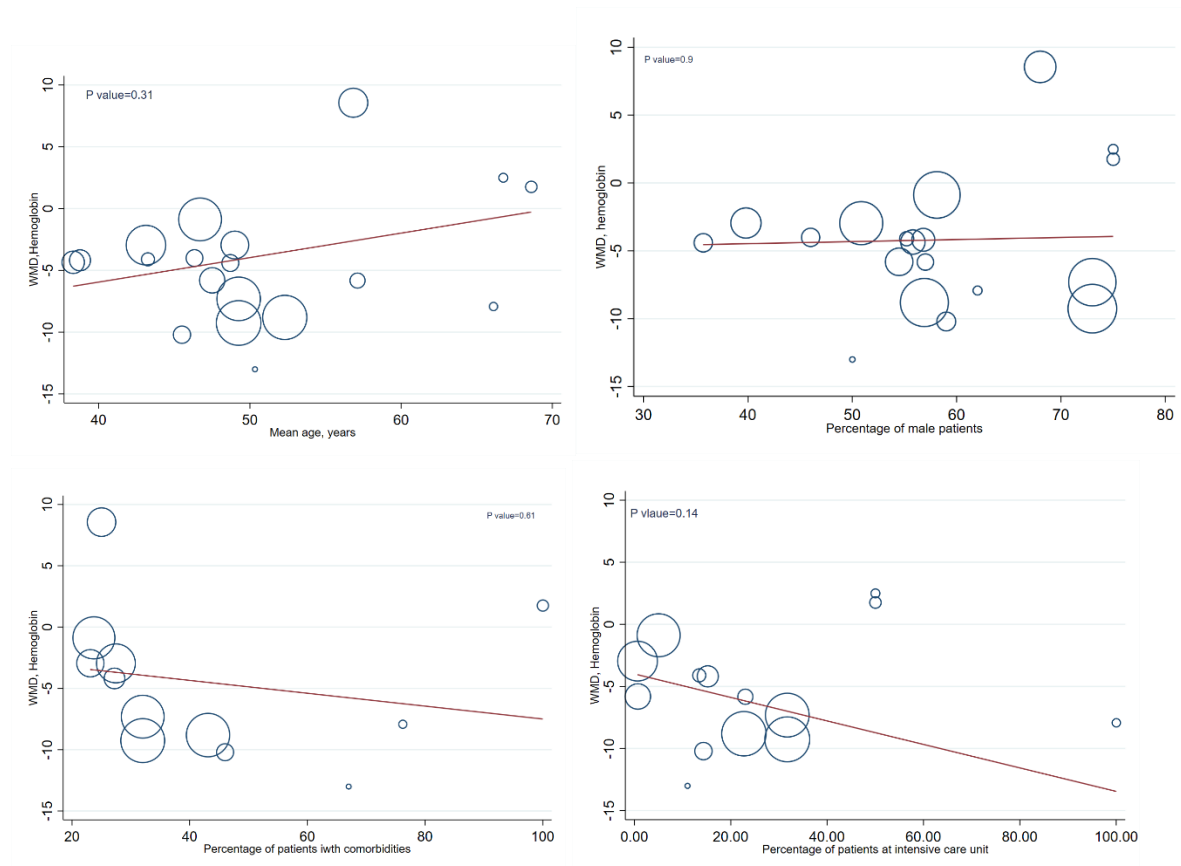

**Supplemental figure S7.** Bubble plots on mean ferritin levels by age and percentage of male patients overall (a) and including paediatric population (b), mean percentage of patients with hypertension (c) mean ferritin levels by mean haemoglobin levels (d)

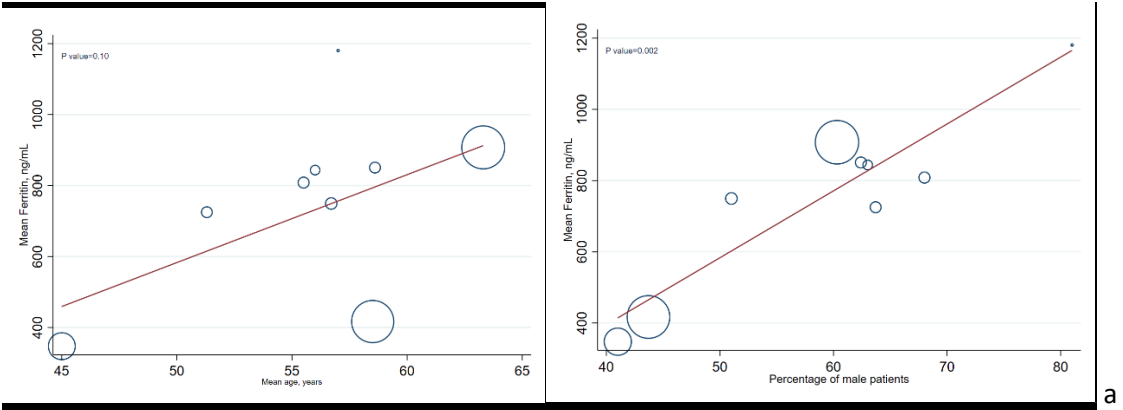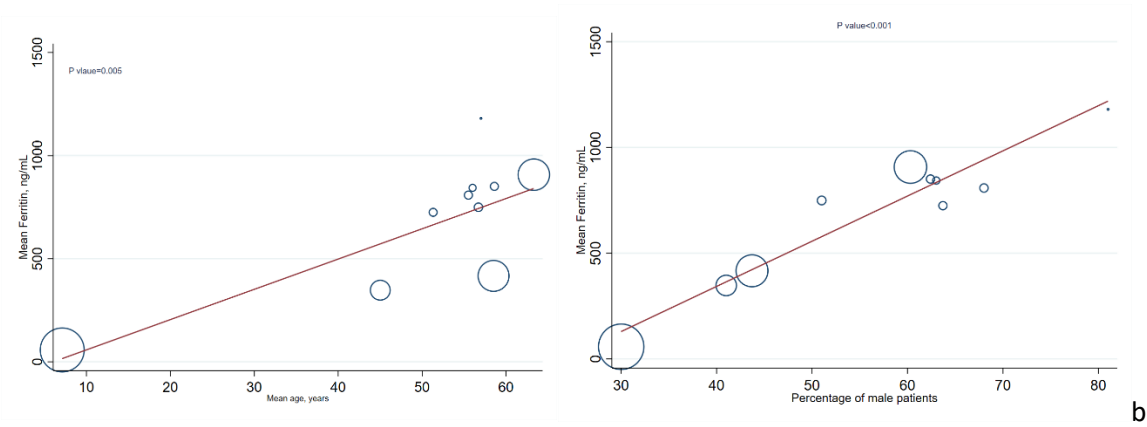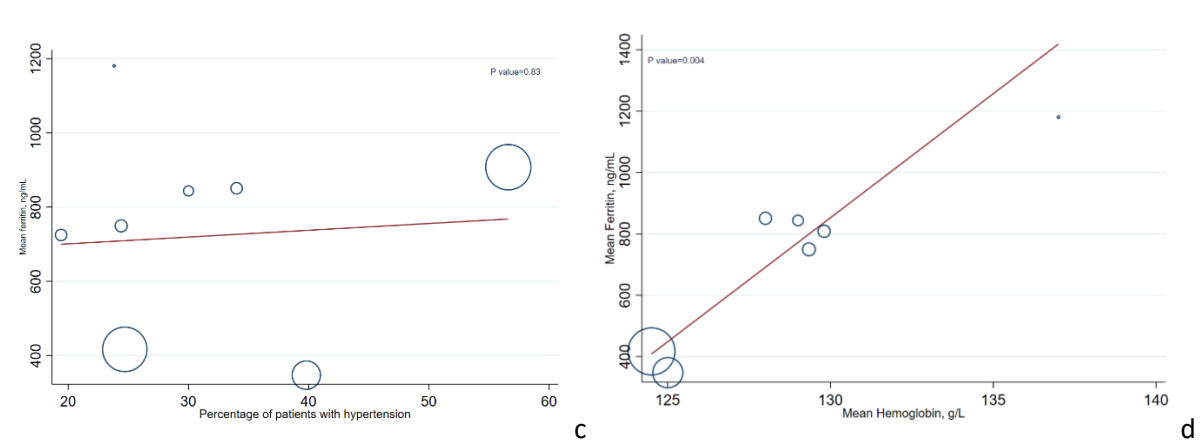

**Supplemental figure S8.** Publication bias for the meta-analysis on differences in mean hemoglobin levels between severe and moderate COVID-19 patients (a) and between deceased and survived Covid-19 cases (b)

a)

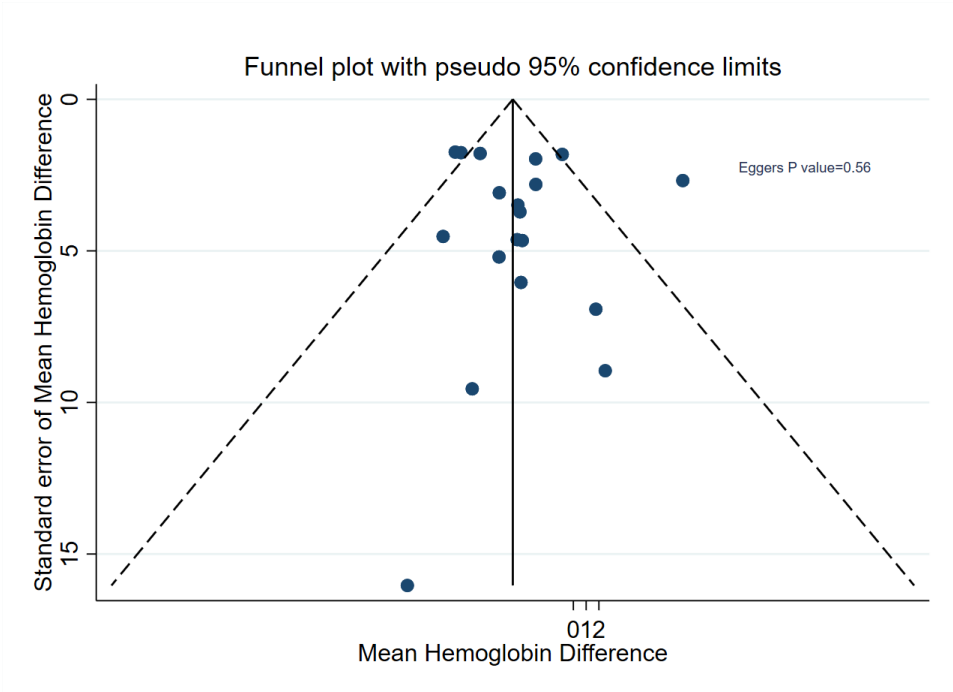

b)

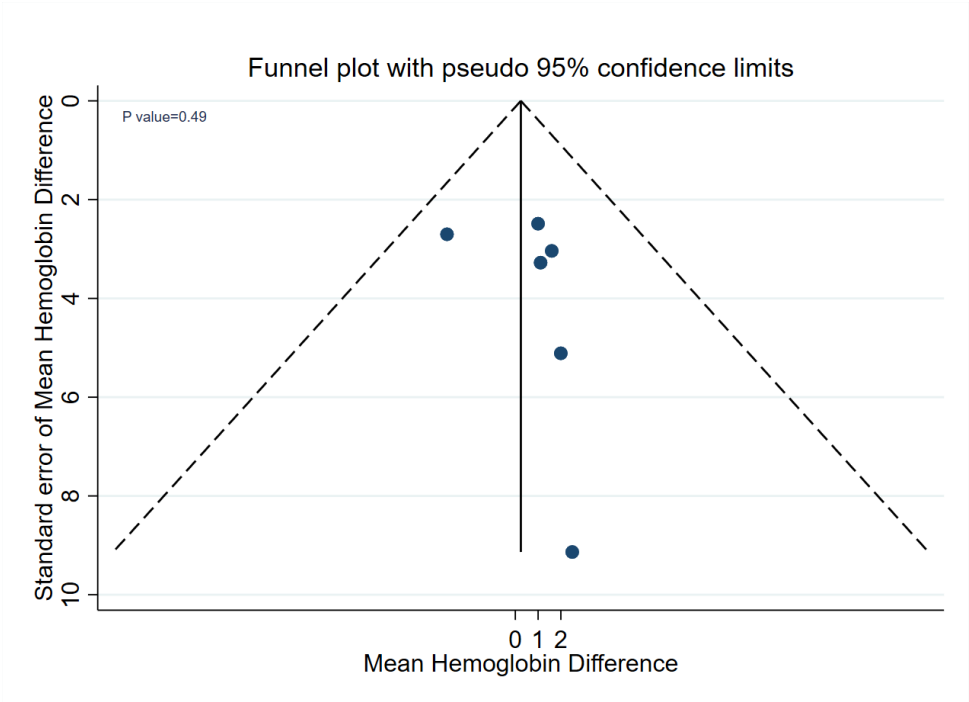



Supplemental table S1. Characteristics of studies included in current review

| DOI                           | Author name  | Study Design                     | No. of individuals | Study location | Mean Age (SD) | Pediatric/Adult/Mix population | Percentage of males(n%) | Survival | Percentages of individuals with comorbidities | Ferritin | Hemoglobin | Study Quality |
|-------------------------------|--------------|----------------------------------|--------------------|----------------|---------------|--------------------------------|-------------------------|----------|-----------------------------------------------|----------|------------|---------------|
| 10.1136/bmj.m1092             | Chen et al.  | Retrospective study              | 274                | China          | 58,6 (19,4)   | Adult                          | 62,40                   | 58,7     | 49                                            | x        | x          | 8             |
| 10.1016/S0140-6736(20)30211-7 | Chen et al.  | Descriptive study                | 99                 | China          | 55,5 (13,1)   | Adult                          | 68                      | 89,0     | 51                                            | x        | x          | 7             |
| 10.1172/JCI137244             | Chen et al.  | Retrospective study              | 21                 | China          | 57,0 (11,9)   | Adult                          | 81                      | 80,9     | 38,1                                          | x        | x          | 7             |
| 10.1016/j.kint.2020.03.005    | Cheng et al. | Prospective cohort study         | 701                | China          | 61,3 (15,6)   | Adult                          | 52,4                    | 83,9     | 42,60                                         |          | x          | 8             |
| 10.1007/s15010-020-01427-2    | Du et al.    | Retrospective study              | 67                 | China          | 24,7 (7,2)    | Mix                            | 47,8                    | 100      | N/A                                           |          | x          | 8             |
| 10.1164/rccm.202003-0543OC    | Du et al.    | Retrospective study              | 85                 | China          | 57,9 (21,1)   | Mix                            | 72,90                   | 0        | 68,20                                         |          | x          | 6             |
| 10.1164/rccm.202002-0445OC    | Feng et al.  | Multi-center retrospective study | 476                | China          | 52,3 (17,8)   | Mix                            | 56,90                   | 92       | 43,10                                         |          | x          | 8             |
| 10.1056/NEJMoa2002032         | Guan et al.  | Cross-sectional                  | 1099               | China          | 46,7 (17,1)   | Mix                            | 58,10                   | 98,6     | 23,70                                         |          | x          | 8             |
| 10.1007/s11427-020-1661-4     | Hu et al.    | Cross-sectional                  | 24                 | China          | 35,00 (10,98) | Mix                            | 33,30                   | 100      | N/A                                           |          | x          | 6             |
| 10.1016/S0140-6736(20)30183-5 | Huang et al. | Prospective                      | 41                 | China          | 49,25 (4,91)  | Adult                          | 73,00                   | 85       | 32,00                                         |          | x          | 8             |
| 10.1016/j.tmaid.2020.101606   | Huang et al. | Retrospective                    | 34                 | China          | 56,24 (1,14)  | Adult                          | 41,20                   | 99,85    | 47,10                                         |          | x          | 6             |

|                                 |               |                       |     |       |                  |           |       |       |       |   |   |   |
|---------------------------------|---------------|-----------------------|-----|-------|------------------|-----------|-------|-------|-------|---|---|---|
| 10.1136/gutjnl-2020-320926      | Jin et al.    | Retrospective         | 651 | China | 45,20<br>(14,43) | Adult     | 50,84 | 90,76 | 27,34 |   | x | 8 |
| 10.1016/j.tmaid.2020.101664     | Lei et al.    | Cross-sectional       | 119 | China | 53,4 (13,3)      | Adult     | 64,70 | 0     | 47,80 |   | x | 7 |
| 10.1016/j.ijid.2020.03.053      | Li et al.     | Retrospective         | 25  | China | 75,25<br>(12,99) | Adult     | 40,00 | 100   | 100   |   | x | 6 |
| 10.1016/j.jaci.2020.04.006      | Li et al.     | Prospective           | 548 | China | 59,25<br>(6,06)  | Adult     | 50,90 | 94,65 | 64,40 | x |   | 9 |
| 10.1093/cid/ciaa242             | Lian et al.   | Retrospective         | 788 | China | 45,83<br>(10,79) | Mix       | 51,70 | 86,53 | 27,60 |   | x | 8 |
| 10.1016/j.jinf.2020.03.005      | Liu et al.    | Cross-sectional       | 56  | China | 52,48 (<br>3,68) | Adult     | 55,35 | 100   | N/A   |   | x | 8 |
| 10.1016/j.jinf.2020.04.002      | Liu et al.    | Retrospective         | 245 | China | 53,95<br>(16,90) | Adult     | 46,53 | 85    | N/A   |   | x | 8 |
| 10.14309/ajg.0000000000000620   | Pan L et al.  | Cross-sectional study | 204 | China | 52,91<br>(15,98) | Adult     | 52,45 | 17,65 | N/A   |   | x | 8 |
| 10.1002/ctm2.23.                | Pan Y et al.  | Case-controls study   | 84  | China | 58,6 (15,6)      | Adult     | 60,71 | N/A   | N/A   |   | x | 7 |
| 10.1016/j.jcv.2020.104353       | Tan et al.    | Retrospective study   | 10  | China | 7,1 (3,6)        | Pediatric | 30,0  | 100   | 0     | x |   | 6 |
| 10.1016/j.ijid.2020.03.070      | Wang et al.   | Retrospective cohort  | 125 | China | 38,76<br>(13,7)  | Mix       | 56,8  | N/A   | 27,20 |   | x | 6 |
| 10.1016/j.jinf.2020.03.019      | Wang L et al. | Retrospective cohort  | 339 | China | 70 (8,18)        | Adult     | 49    | 80,82 | N/A   |   | x | 8 |
| 10.1093/cid/ciaa272             | Wang Z et al. | Retrospective cohort  | 69  | China | 46,33<br>(20,44) | Mix       | 46    | 7,5   | N/A   |   | x | 7 |
| 10.1001/jamainternmed.2020.0994 | Wu C et al.   | Retrospective cohort  | 201 | China | 51,3 (12,6)      | Mix       | 63,7  | 78,1  | 32,8  | x |   | 6 |
| 10.1093/cid/ciaa199             | Wu J et al.   | Cross-sectional study | 80  | China | 46,1<br>(15,42)  | Mix       | 48,75 | 100   | 47,50 |   | X | 7 |

|                               |                   |                       |       |           |               |           |        |       |       |   |   |   |
|-------------------------------|-------------------|-----------------------|-------|-----------|---------------|-----------|--------|-------|-------|---|---|---|
| 10.1016/S2213-2600(20)30079-5 | Yang X et al.     | Retrospective cohort  | 52    | China     | 51,9 (12,9)   | Adult     | 67     | 38,4  | 40    |   | x | 8 |
| 10.1001/jama.2020.3204        | Young B et al.    | Cross-sectional study | 18    | Singapore | 50,33 (33,78) | Mix       | 50     | 100   | 28    |   | x | 6 |
| 10.1016/j.ijid.2020.03.040    | Zhang X et al.    | Retrospective cohort  | 645   | China     | 43,12 (13,91) | Mix       | 50,85  | 100   | 27,44 |   | x | 8 |
| 10.26355/eurrev_202003_20711  | Zheng et al.      | Retrospective cohort  | 161   | China     | 45 (17,5)     | Adult     | 49,7   | N/A   | 20,5  |   | x | 7 |
| 10.1016/S0140-6736(20)30566-3 | Zhou et al.       | Retrospective cohort  | 191   | China     | 56 (15,68)    | Adult     | 119,62 | 71,27 | 48    | x | x | 8 |
| 10.1001/jama.2020.6775        | Richardson et al. | Descriptive study     | 4,344 | USA       | 63.3          | Mix       | 60.3   | 93.9  | N/A   | x |   | 9 |
| 10.1515/dx-2020-0046          | Aggarwal et al.   | Retrospective         | 16    | USA       | 66,75 (16,45) | Adult     | 75,00  | 81,25 | N/A   |   | x | 7 |
| 10.1016/j.gendis.2020.03.008  | Chen et al.       | Cross-sectional       | 12    | China     | 13,50 (1,86)  | Pediatric | 50,00  | 100   | N/A   |   | x | 7 |
| 10.1007/s15010-020-01432-5    | Chen et al.       | Retrospective         | 145   | China     | 47,50 (14,60) | Adult     | 54,48  | 100   | N/A   |   | x | 8 |
| 10.1002/ajh.25774             | Fan et al.        | Cross-sectional       | 67    | Singapore | 43,25 (5,49)  | Adult     | 55,20  | 100   | N/A   |   | x | 8 |
| 10.1002/dmrr.3319             | Guo et al.        | Retrospective         | 174   | China     | 58,50 (5,18)  | Adult     | 43,70  | 94,8  | N/A   | x | x | 8 |
| 10.1016/j.numecd.2020.04.013  | Li et al.         | Retrospective         | 83    | China     | 45 (8,62)     | Adult     | 41,00  | 92,8  | N/A   | x | x | 9 |
| 10.1038/s41374-020-0431-6     | Li et al.         | Retrospective         | 54    | China     | 61,8 (14,5)   | Adult     | 63,00  | 88,9  | 55,60 | x |   | 7 |
| 10.1007/s11596-020-2176-2     | Li et al.         | Retrospective         | 25    | China     | 48,48 (7,70)  | Adult     | 48,00  | 80    | N/A   | x |   | 8 |

|                                 |              |                            |     |              |                  |       |       |       |        |   |   |   |
|---------------------------------|--------------|----------------------------|-----|--------------|------------------|-------|-------|-------|--------|---|---|---|
| 10.1038/s41430-020-0642-3       | Li et al.    | Cross-sectional            | 182 | China        | 68,50<br>(8,80)  | Adult | 35,71 | N/A   | N/A    |   | x | 9 |
| 10.1016/j.ebiom.2020.102763     | Liu et al.   | Retrospective              | 40  | China        | 48,70<br>(13,90) | Adult | 37,50 | 92,5  | 35,00  | x | x | 8 |
| 10.4158/EP-2020-0108            | Wang F et al | Retrospective              | 28  | Wuhan, China | 68,6 (9,0)       | Adult | 75,00 | 57,10 | 100,00 | x | x | 8 |
| 10.1172/jci.insight.137799      | Wang F et al | Prospective                | 65  | Wuhan, China | 57,11<br>(13,03) | Adult | 57,00 | 92    | N/A    | x | x | 8 |
| 10.2147/CLEP.S249903            | Wang L et al | Cross-sectional            | 26  | Wuhan, China | 42,93<br>(15,52) | Adult | 42,30 | N/A   | N/A    |   | x | 6 |
| 10.1002/jmv.25930               | Xie J et al  | Cross-sectional            | 56  | Wuhan, China | 56,83<br>(11,79) | Adult | 68,00 | N/A   | 25,00  |   | x | 6 |
| 10.1002/jmv.25944               | Xu T et al   | Retrospective              | 15  | China        | 26,66<br>(15,54) | Mixed | 66,70 | 100   | 20,00  |   | x | 7 |
| 10.1136/bmjdr-2020-001343       | Yan Y et al  | Retrospective              | 193 | Wuhan, China | 62 ( 17,93)      | Adult | 59,10 | 60    | 48,70  | x | x | 8 |
| 10.20452/pamw.15312             | Yao Q et al  | Retrospective              | 108 | China        | 49 (15,78)       | Adult | 39,80 | 89    | 23,10  | x |   | 8 |
| 10.1016/j.clinthera.2020.04.009 | Yu T et al   | Cross-sectional            | 95  | China        | 38,31<br>(17,19) | Adult | 55,80 | N/A   | N/A    |   | x | 8 |
| 10.1080/09537104.2020.1754383   | Liu et al.   | Retrospective cohort study | 383 | China        | 47,0 (20,1)      | Adult | 42,30 | 87,2  | N/A    |   | x | 9 |
| 10.1371/journal.ppat.1008520    | Meng et al.  | Retrospective study        | 168 | China        | 56,7 ( 15,1)     | Adult | 51,20 | 86,60 | 33,90  | x | x | 9 |
| 10.1016/j.jcrc.2020.04.004      | Piva et al.  | single-center cohort study | 33  | Italy        | 65 (10,1)        | Adult | 93,90 | 97,0  | N/A    |   | x | 7 |
| 10.1016/j.jaut.2020.102473      | Sun et al.   | Retrospective study        | 63  | China        | 45,5 (17,6)      | Mix   | 58,70 | 100   | 46     |   | x | 8 |
| 10.1016/j.cca.2020.04.024       | Sun et al.   | Retrospective study        | 116 | China        | 49,3<br>(12,01)  | Adult | 51,70 | 100   | N/A    |   | x | 7 |

|                   |             |                     |    |       |                 |       |      |       |       |  |   |   |
|-------------------|-------------|---------------------|----|-------|-----------------|-------|------|-------|-------|--|---|---|
| 10.1111/cts.12805 | Zhou et al. | Retrospective study | 21 | China | 66,1<br>(13,94) | Adult | 61,9 | 85,70 | 76,20 |  | x | 6 |
|-------------------|-------------|---------------------|----|-------|-----------------|-------|------|-------|-------|--|---|---|

| Supplementary Table S2. Subgroup analyses                                    |        |                   |                         |                                  |                                             |
|------------------------------------------------------------------------------|--------|-------------------|-------------------------|----------------------------------|---------------------------------------------|
| Subgroups by study characteristics                                           |        | Number of studies | Mean (95 % CI)          | I <sup>2</sup> for heterogeneity | P value for heterogeneity (meta-regression) |
| Mean serum total hemoglobin, g/L                                             |        |                   |                         |                                  |                                             |
| <sup>a</sup> Median age, y                                                   | ≤50.33 | 25                | 133.33 (131.20; 135.45) | 97.6%                            | 0.001                                       |
|                                                                              | >50.33 | 24                | 127.15 (125.13;129.17)  | 98.3%                            |                                             |
| Median percentage of male population, %                                      | ≤54.48 | 25                | 130.41(128.42;132.39)   | 98.8%                            | 0.33                                        |
|                                                                              | >54.48 | 24                | 131.33 (128.85;133.81)  | 94.7%                            |                                             |
| Median percentage of population with comorbidities, % <sup>1</sup>           | ≤39.05 | 16                | 126.400 122.247 130.553 | 97.2%                            | 0.04                                        |
|                                                                              | >39.05 | 14                | 128.620 126.846 130.394 | 81.5%                            |                                             |
| Median percentage of population with cardiovascular diseases, % <sup>1</sup> | ≤8     | 16                | 130.88 (128.12; 133.65) | 98.7%                            | 0.17                                        |
|                                                                              | >8     | 15                | 127.53 (124.29; 130.78) | 95.3%                            |                                             |
| Median percentage of population with hypertension, % <sup>1</sup>            | ≤21.1  | 17                | 130.67 (127.89; 133.45) | 98.4%                            | 0.35                                        |
|                                                                              | >21.1  | 17                | 132.37 (128.98; 135.76) | 92.2%                            |                                             |
| Median percentage of population with type 2 diabetes, % <sup>1</sup>         | ≤11.5  | 19                | 132.30 ( 130.01; 134.6) | 92.8%                            | 0.01                                        |
|                                                                              | >11.5  | 17                | 126.46 (124.23; 128.69) | 97.7%                            |                                             |
| Population                                                                   | Adult  | 33                | 129.15(126.58; 131.712) | 98.3%                            | 0.04                                        |

|                                                                                  |                     |    |                        |       |       |
|----------------------------------------------------------------------------------|---------------------|----|------------------------|-------|-------|
|                                                                                  | Adult and pediatric | 15 | 133.59(131.04; 136.14) | 95%   |       |
| Median percentage of population at ICU, % <sup>1</sup>                           | ≤15.64              | 19 | 135.25 (133.29;137.20) | 96.4% | 0.001 |
|                                                                                  | >15.64              | 18 | 128.88 (126.66;131.10) | 89.2% |       |
| Median percentage of population survived at the end of the study, % <sup>1</sup> | ≤90.76              | 14 | 129.08 (127.45;130.71) | 84.5% | 0.17  |
|                                                                                  | >90.76              | 13 | 132.08(128.78;135.38)  | 99%   |       |
| <sup>1</sup> information was not available for every study                       |                     |    |                        |       |       |

| Supplementary Table S3. Subgroup analyses                                    |                     |                   |                          |                         |                                               |
|------------------------------------------------------------------------------|---------------------|-------------------|--------------------------|-------------------------|-----------------------------------------------|
| Subgroups by study characteristics                                           |                     | Number of studies | Mean (95 % CI)           | $I^2$ for heterogeneity | $P$ value for heterogeneity (meta-regression) |
| Mean serum total Ferritin, ng/L                                              |                     |                   |                          |                         |                                               |
| <sup>a</sup> Median age, y                                                   | ≤56.7               | 5                 | 692.92 (449.81;936.03)   | 97.8%                   | 0.59                                          |
|                                                                              | >56.37              | 5                 | 805.43 (460.51; 1150.35) | 99.6%                   |                                               |
| Median percentage of male population, %                                      | ≤62.4               | 5                 | 653.529 382.685 924.372  | 99.6%                   | 0.25                                          |
|                                                                              | >62.4               | 4                 | 801.191 718.359 884.023  | 41.4%                   |                                               |
| Median percentage of population with comorbidities, % <sup>1</sup>           |                     |                   | NA                       |                         |                                               |
|                                                                              |                     |                   | NA                       |                         |                                               |
| Median percentage of population with cardiovascular diseases, % <sup>1</sup> |                     |                   | NA                       |                         |                                               |
|                                                                              |                     |                   | NA                       |                         |                                               |
| Median percentage of population with hypertension, % <sup>1</sup>            | 27.35%              | 4                 | 702.693 457.949 947.437  | 96.5%                   | 0.89                                          |
|                                                                              | 27.35%              | 3                 | 736.672 392.191 1081.154 | 99.5%                   |                                               |
| Population                                                                   | Adult               |                   | 838.46 (780.32; 896.59)  | 0%                      | 0.12                                          |
|                                                                              | Adult and pediatric |                   | 628.72 (360.04; 897.41)  | 99-6%                   |                                               |
| Median percentage of population at ICU, % <sup>1</sup>                       |                     |                   | NA                       |                         |                                               |



|                                                                                  |  |  |    |  |  |
|----------------------------------------------------------------------------------|--|--|----|--|--|
|                                                                                  |  |  | NA |  |  |
| Median percentage of population survived at the end of the study, % <sup>1</sup> |  |  | NA |  |  |
|                                                                                  |  |  | NA |  |  |
| <sup>1</sup> information was not available for sufficient number of study (n=8)  |  |  |    |  |  |

| Supplementary Table S4. Subgroup analyses                                        |                     |                   |                       |                                               |                                                          |
|----------------------------------------------------------------------------------|---------------------|-------------------|-----------------------|-----------------------------------------------|----------------------------------------------------------|
| Subgroups by study characteristics                                               |                     | Number of studies | Mean (95 % CI)        | <sup>2</sup> I <sup>2</sup> for heterogeneity | <sup>3</sup> P value for heterogeneity (meta-regression) |
| Mean difference in total hemoglobin, g/L (severe vs moderate cases)              |                     |                   |                       |                                               |                                                          |
| <sup>a</sup> Median age, y                                                       | ≤49                 | 10                | -3.28 (-5.14; -1.43)  | 0%                                            | 0.88                                                     |
|                                                                                  | >49                 | 9                 | -4.13 (-9.1; 0.83)    | 79.2%                                         |                                                          |
| Median percentage of male population, %                                          | ≤56.9               | 7                 | -5.30 (-7.18; -3.43)  | 0%                                            | 0.58                                                     |
|                                                                                  | >56.9               | 9                 | -3.34 (-8.14 ; 1.46)  | 80.4%                                         |                                                          |
| Median percentage of population with comorbidities, % <sup>1</sup>               | ≤32                 | 11                | -3.35 (-6.47; -0.24)  | 73.7%                                         | 0.22                                                     |
|                                                                                  | >32                 | 5                 | -8.44 (-11.51; -5.37) | 0%                                            |                                                          |
| Population                                                                       | Adult               | 12                | -3.58 (-7.24; 0.07)   | 69.2%                                         | 0.62                                                     |
|                                                                                  | Adult and pediatric | 7                 | -4.86 (-8.04; -1.68)  | 51.8%                                         |                                                          |
| Median percentage of population at ICU, %                                        | ≤18.95              | 12                | -2.62 (-5.41; 0.16)   | 52%                                           | 0.04                                                     |
|                                                                                  | >18.95              | 7                 | -8.03 (-9.95; -6.12)  | 0%                                            |                                                          |
| Median percentage of population survived at the end of the study, % <sup>2</sup> | ≤90.76              | NA                | NA                    | NA                                            |                                                          |
|                                                                                  | >90.76              | NA                | NA                    | NA                                            |                                                          |
| <sup>1</sup> information was not available for every study                       |                     |                   |                       |                                               |                                                          |

2 in total, 9 studies provided necessary information, therefore we could not perform subgroup analysis

**Supplemental Table S4. Study Quality Assessment**

| <b>Author-Journal</b> | <b>Selection</b> | <b>Comparability</b> | <b>Outcome</b> | <b>Total</b> | <b>Comments</b>                                                            |
|-----------------------|------------------|----------------------|----------------|--------------|----------------------------------------------------------------------------|
| Chen-JCI (1)          | 3                | 1                    | 3              | 7            | Retrospective assessment in a single center study, SARS COV2 positive only |
| Chen-Lancet (2)       | 3                | 1                    | 3              | 7            | Retrospective single center                                                |
| Chen-BMJ (3)          | 4                | 1                    | 3              | 8            | Single center cohort                                                       |
| Cheng-KI (4)          | 3                | 2                    | 3              | 8            | 3 centers                                                                  |
| Du-Infection (5)      | 4                | 1                    | 3              | 8            | 2 centers, restrospective                                                  |
| Du-AJRCCM (6)         | 3                | 1                    | 2              | 6            | 2 centers retrospective, only included mortalities                         |
| Feng-AJRCCM (7)       | 4                | 1                    | 3              | 8            | 3 center study restrospective, all spectrum of cases                       |
| Guan-NEJM (8)         | 4                | 2                    | 2              | 8            | 552 centers (Largest study?)                                               |
| Hu-SCLF (9)           | 3                | 1                    | 2              | 6            | Only asymptomatic, restrospective study from screening centers             |
| Huang-Lancet (10)     | 4                | 1                    | 3              | 8            | Outbreak investigation, retrospective study                                |
| Huang-TMID (11)       | 3                | 1                    | 2              | 6            | CS study on Editorial Letter format. No details on methods. Single center  |

|               |   |   |   |   |                                                                                     |
|---------------|---|---|---|---|-------------------------------------------------------------------------------------|
| Jin-Gut (12)  | 3 | 2 | 3 | 8 | Few details on the recruitment of participants, retrospective data                  |
| Lei-TMID (13) | 3 | 1 | 3 | 7 | Cross sectional study, single center                                                |
| Li-IJID (14)  | 3 | 1 | 2 | 6 | Single center, only mortalities are included                                        |
| Li-JACI (15)  | 4 | 2 | 3 | 9 | Ambispective cohort analysis                                                        |
| Lian-CID (16) | 3 | 2 | 3 | 8 | Analysis on elderly vs non-elderly outcomes                                         |
| Liu-JI (17)   | 3 | 2 | 3 | 8 | Restrospective analysis, single center, with age stratified analysis                |
| Liu-JI (18)   | 3 | 2 | 3 | 8 | Single center, retrospective analysis, with analysis on biomarkers and risk factors |
| Pan-AJG (19)  | 3 | 2 | 3 | 8 | CS, 3 centers, random selection of 310 patients from participating centers          |
| Pan-CTM (20)  | 3 | 1 | 3 | 7 | 3 centers, random selection of participants, predictive acuity of routine tests     |
| Tan-JCV (21)  | 3 | 1 | 2 | 6 | COVID in children, single center, small sample size                                 |
| Wang-JI (22)  | 3 | 2 | 3 | 8 | Only included elderly, single center, only in severe                                |

|                  |   |   |   |   |                                                                     |
|------------------|---|---|---|---|---------------------------------------------------------------------|
| Wang-IJID (23)   | 3 | 1 | 2 | 6 | Purely descriptive study,                                           |
| Wang-CID (24)    | 3 | 1 | 3 | 7 | Single center, only admitted patient                                |
| Wu-JAMA (25)     | 3 | 1 | 3 | 7 | Single center, confirmed cases,<br>Comparison on ARDS/death study   |
| Wu-CID (26)      | 3 | 1 | 2 | 6 | Multicenter, retrospective, study<br>outside Wuhan                  |
| Yang-NEJM (27)   | 3 | 2 | 3 | 8 | Single center, only critically ill<br>patients                      |
| Young-JAMA (28)  | 3 | 1 | 2 | 6 | Outbreak response in Singapore ,<br>purely descriptive study        |
| Zhang-IJID (29)  | 3 | 2 | 3 | 8 | Focus on radiologic analysis                                        |
| Zheng-ERMPS (30) | 3 | 1 | 3 | 7 | Single center retrospective data<br>collection on confirmed cases   |
| Zhou-NEJM (31)   | 3 | 2 | 3 | 8 | Retrospective cohort, only adults<br>with confirmed case, 2 centers |
| Wang-EP (32)     | 3 | 2 | 3 | 8 | Study limited only to diabetes                                      |
| Wang-CE (33)     | 3 | 2 | 3 | 8 | Limited to patient transmission                                     |
| Wang-JCI (34)    | 3 | 1 | 2 | 6 | Laboratory assay of 65 COVID<br>patients focusing on immunity       |
| Xie-JMV (35)     | 3 | 1 | 2 | 6 | Validation of an IgG-IgM test using<br>56 patients                  |

|               |   |   |   |   |                                                                           |
|---------------|---|---|---|---|---------------------------------------------------------------------------|
| Xu-JMV (36)   | 3 | 2 | 2 | 7 | Focus on asymptomatic cases and clinical trajectory                       |
| Yan-BMJO (37) | 3 | 2 | 3 | 8 | Study on patients with diabetes, single center observational study        |
| Yu-CT (38)    | 3 | 2 | 3 | 8 | Cross sectional multicenter, to determine risk factors for severe disease |
| Yao-PAIM (39) | 3 | 2 | 3 | 8 | Retrospective review on severe cases                                      |
| Aggarwal (40) | 3 | 1 | 3 | 7 | Single center retrospective data collection on confirmed cases            |
| Chen (41)     | 3 | 1 | 3 | 7 | Cross-sectional study, limited data                                       |
| Chen (42)     | 4 | 1 | 3 | 8 | Retrospective data of 145 patients                                        |
| Fan (43)      | 4 | 1 | 3 | 8 | Data of National Centre for Infectious Diseases (NCID)                    |
| Guo (44)      | 3 | 2 | 3 | 8 | Study limited only to diabetes                                            |
| Li (45)       | 4 | 2 | 3 | 9 | Study limited only to CVD                                                 |
| Li (46)       | 3 | 1 | 3 | 7 | Single center retrospective data collection on confirmed cases            |
| Li (47)       | 3 | 2 | 3 | 8 | Data from a single thoracic department                                    |
| Li (48)       | 4 | 2 | 3 | 9 | 182 elderly patients                                                      |

|                 |   |   |   |    |                                                              |
|-----------------|---|---|---|----|--------------------------------------------------------------|
| Liu (49)        | 3 | 2 | 3 | 8  | Retrospective single center study                            |
| Sun (50)        | 3 | 2 | 2 | 7  | Retrospective study                                          |
| Sun (51)        | 3 | 2 | 3 | 8  | Retrospective study                                          |
| Piva (52)       | 3 | 2 | 2 | 7  | Single-center observational cohort study                     |
| Meng (53)       | 3 | 3 | 3 | 9  | Retrospective study of severe and critically ill patients    |
| Liu (54)        | 3 | 3 | 3 | 9  | Retrospective cohort study                                   |
| Zhou (55)       | 2 | 2 | 2 | 6  | Retrospective study of severe and critically ill patients    |
| Richardson (56) | 4 | 3 | 3 | 10 | Retrospective analysis of sequentially hospitalized patients |

1. Chen G, Wu D, Guo W, Cao Y, Huang D, Wang H, et al. Clinical and immunologic features in severe and moderate Coronavirus Disease 2019. *The Journal of clinical investigation*. 2020.
2. Chen N, Zhou M, Dong X, Qu J, Gong F, Han Y, et al. Epidemiological and clinical characteristics of 99 cases of 2019 novel coronavirus pneumonia in Wuhan, China: a descriptive study. *The Lancet*. 2020;395(10223):507-13.
3. Chen T, Wu D, Chen H, Yan W, Yang D, Chen G, et al. Clinical characteristics of 113 deceased patients with coronavirus disease 2019: retrospective study. *BMJ (Clinical research ed)*. 2020;368:m1091.
4. Cheng Y, Luo R, Wang K, Zhang M, Wang Z, Dong L, et al. Kidney disease is associated with in-hospital death of patients with COVID-19. *Kidney International*. 2020;20:20.
5. Du W, Yu J, Wang H, Zhang X, Zhang S, Li Q, et al. Clinical characteristics of COVID-19 in children compared with adults in Shandong Province, China. *Infection*. 2020.
6. Du Y, Tu L, Zhu P, Mu M, Wang R, Yang P, et al. Clinical Features of 85 Fatal Cases of COVID-19 from Wuhan: A Retrospective Observational Study. *American journal of respiratory and critical care medicine*. 2020.
7. Feng Y, Ling Y, Bai T, Xie Y, Huang J, Li J, et al. COVID-19 with Different Severity: A Multi-center Study of Clinical Features. *American journal of respiratory and critical care medicine*. 2020.
8. Guan WJ, Ni ZY, Hu Y, Liang WH, Ou CQ, He JX, et al. Clinical Characteristics of Coronavirus Disease 2019 in China. *The New England journal of medicine*. 2020.



9. Hu Z, Song C, Xu C, Jin G, Chen Y, Xu X, et al. Clinical characteristics of 24 asymptomatic infections with COVID-19 screened among close contacts in Nanjing, China. *Science China Life sciences*. 2020.
10. Huang C, Wang Y, Li X, Ren L, Zhao J, Hu Y, et al. Clinical features of patients infected with 2019 novel coronavirus in Wuhan, China. *The Lancet*. 2020;395(10223):497-506.
11. Huang Y, Tu M, Wang S, Chen S, Zhou W, Chen D, et al. Clinical characteristics of laboratory confirmed positive cases of SARS-CoV-2 infection in Wuhan, China: A retrospective single center analysis. *Travel Medicine and Infectious Disease*. 2020.
12. Jin X, Lian JS, Hu JH, Gao J, Zheng L, Zhang YM, et al. Epidemiological, clinical and virological characteristics of 74 cases of coronavirus-infected disease 2019 (COVID-19) with gastrointestinal symptoms. *Gut*. 2020.
13. Lei Z, Cao H, Jie Y, Huang Z, Guo X, Chen J, et al. A cross-sectional comparison of epidemiological and clinical features of patients with coronavirus disease (COVID-19) in Wuhan and outside Wuhan, China. *Travel Medicine and Infectious Disease*. 2020:101664.
14. Li X, Wang L, Yan S, Yang F, Xiang L, Zhu J, et al. Clinical characteristics of 25 death cases with COVID-19: a retrospective review of medical records in a single medical center, Wuhan, China. *International journal of infectious diseases : IJID : official publication of the International Society for Infectious Diseases*. 2020.
15. Li X, Xu S, Yu M, Wang K, Tao Y, Zhou Y, et al. Risk factors for severity and mortality in adult COVID-19 inpatients in Wuhan. *J Allergy Clin Immunol*. 2020.
16. Lian J, Jin X, Hao S, Cai H, Zhang S, Zheng L, et al. Analysis of Epidemiological and Clinical features in older patients with Corona Virus Disease 2019 (COVID-19) out of Wuhan. *Clinical infectious diseases : an official publication of the Infectious Diseases Society of America*. 2020.
17. Liu K, Chen Y, Lin R, Han K. Clinical features of COVID-19 in elderly patients: A comparison with young and middle-aged patients. *Journal of Infection*. 2020.
18. Liu Y, Du X, Chen J, Jin Y, Peng L, Wang HHX, et al. Neutrophil-to-lymphocyte ratio as an independent risk factor for mortality in hospitalized patients with COVID-19. *J Infect*. 2020.
19. Pan L, Mu M, Yang P, Sun Y, Wang R, Yan J, et al. Clinical Characteristics of COVID-19 Patients With Digestive Symptoms in Hubei, China: A Descriptive, Cross-Sectional, Multicenter Study. *Am J Gastroenterol*. 2020.
20. Pan Y, Ye G, Zeng X, Liu G, Zeng X, Jiang X, et al. Can routine laboratory tests discriminate SARS-CoV-2 infected pneumonia from other causes of community acquired pneumonia? *Clinical and Translational Medicine*. 2020.
21. Tan YP, Tan BY, Pan J, Wu J, Zeng SZ, Wei HY. Epidemiologic and clinical characteristics of 10 children with coronavirus disease 2019 in Changsha, China. *Journal of Clinical Virology*. 2020;127.
22. Wang L, He W, Yu X, Hu D, Bao M, Liu H, et al. Coronavirus disease 2019 in elderly patients: Characteristics and prognostic factors based on 4-week follow-up. *Journal of Infection*. 2020.
23. Wang R, Pan M, Zhang X, Fan X, Han M, Zhao F, et al. Epidemiological and clinical features of 125 Hospitalized Patients with COVID-19 in Fuyang, Anhui, China. *International journal of infectious diseases : IJID : official publication of the International Society for Infectious Diseases*. 2020.
24. Wang Z, Yang B, Li Q, Wen L, Zhang R. Clinical Features of 69 Cases with Coronavirus Disease 2019 in Wuhan, China. *Clinical infectious diseases : an official publication of the Infectious Diseases Society of America*. 2020.
25. Wu C CC, Cai Y, Xia J, Zhou X, Xu S, et al. Risk Factors Associated With Acute Respiratory Distress Syndrome and Death in Patients With Coronavirus Disease 2019 Pneumonia in Wuhan, China. *JAMA Internal Medicine*. 2020.
26. Wu J, Liu J, Zhao X, Liu C, Wang W, Wang D, et al. Clinical Characteristics of Imported Cases of COVID-19 in Jiangsu Province: A Multicenter Descriptive Study. *Clinical infectious diseases : an official publication of the Infectious Diseases Society of America*. 2020.

27. Yang X, Yu Y, Xu J, Shu H, Liu H, Wu Y, et al. Clinical course and outcomes of critically ill patients with SARS-CoV-2 pneumonia in Wuhan, China: a single-centered, retrospective, observational study. 2020.
28. Young BE, Ong SWX, Kalimuddin S, Low JG, Tan SY, Loh J, et al. Epidemiologic Features and Clinical Course of Patients Infected with SARS-CoV-2 in Singapore. *JAMA - Journal of the American Medical Association*. 2020.
29. Zhang X, Cai H, Hu J, Lian J, Gu J, Zhang S, et al. Epidemiological, clinical characteristics of cases of SARS-CoV-2 infection with abnormal imaging findings. *International journal of infectious diseases : IJID : official publication of the International Society for Infectious Diseases*. 2020.
30. Zheng F, Tang W, Li H, Huang YX, Xie YL, Zhou ZG. Clinical characteristics of 161 cases of corona virus disease 2019 (COVID-19) in Changsha. *European Review for Medical and Pharmacological Sciences*. 2020;24(6):3404-10.
31. Zhou F, Yu T, Du R, Fan G, Liu Y, Liu Z, et al. Clinical course and risk factors for mortality of adult inpatients with COVID-19 in Wuhan, China: a retrospective cohort study. *The Lancet*. 2020.
32. Wang F, Yang Y, Dong K, Yan Y, Zhang S, Ren H, et al. Clinical Characteristics of 28 Patients with Diabetes and Covid-19 in Wuhan, China. *Endocr Pract*. 2020.
33. Wang L, Duan Y, Zhang W, Liang J, Xu J, Zhang Y, et al. Epidemiologic and Clinical Characteristics of 26 Cases of COVID-19 Arising from Patient-to-Patient Transmission in Liaocheng, China. *Clin Epidemiol*. 2020;12:387-91.
34. Wang F, Hou H, Luo Y, Tang G, Wu S, Huang M, et al. The laboratory tests and host immunity of COVID-19 patients with different severity of illness. *JCI Insight*. 2020.
35. Xie J, Ding C, Li J, Wang Y, Guo H, Lu Z, et al. Characteristics of patients with coronavirus disease (COVID-19) confirmed using an IgM-IgG antibody test. *Journal of Medical Virology*. 2020.
36. Xu T, Huang R, Zhu L, Wang J, Cheng J, Zhang B, et al. Epidemiological and clinical features of asymptomatic patients with SARS-CoV-2 infection. *Journal of Medical Virology*. 2020.
37. Yan Y, Yang Y, Wang F, Ren H, Zhang S, Shi X, et al. Clinical characteristics and outcomes of patients with severe covid-19 with diabetes. *BMJ Open Diabetes Research & Care*. 2020;8(1).
38. Yu T, Cai S, Zheng Z, Cai X, Liu Y, Yin S, et al. Association Between Clinical Manifestations and Prognosis in Patients with COVID-19. *Clin Ther*. 2020.
39. Yao Q, Wang P, Wang X, Qie G, Meng M, Tong X, et al. Retrospective study of risk factors for severe SARS-Cov-2 infections in hospitalized adult patients. *Pol Arch Intern Med*. 2020.
40. Aggarwal, S., Garcia-Telles, N., Aggarwal, G., Lavie, C., Lippi, G., & Henry, B. (2020). Clinical features, laboratory characteristics, and outcomes of patients hospitalized with coronavirus disease 2019 (COVID-19): Early report from the United States, *Diagnosis*, 7(2), 91-96.
41. Chen, J., Zhang, Z. Z., Chen, Y. K., Long, Q. X., Tian, W. G., Deng, H. J., ... & Hu, P. (2020). The clinical and immunological features of pediatric COVID-19 patients in China. *Genes & Diseases*.
42. Chen, Q., Zheng, Z., Zhang, C. et al. Clinical characteristics of 145 patients with corona virus disease 2019 (COVID-19) in Taizhou, Zhejiang, China. *Infection* (2020).
43. Fan, B. E., Chong, V. C. L., Chan, S. S. W., Lim, G. H., Lim, K. G. E., Tan, G. B., ... & Ong, K. H. (2020). Hematologic parameters in patients with COVID-19 infection. *American journal of hematology*.
44. Guo, W., Li, M., Dong, Y., Zhou, H., Zhang, Z., Tian, C., ... & Zhao, L. (2020). Diabetes is a risk factor for the progression and prognosis of COVID-19. *Diabetes/metabolism research and reviews*.
45. Li, M., Dong, Y., Wang, H., Guo, W., Zhou, H., Zhang, Z., ... & Zhao, L. (2020). Cardiovascular disease potentially contributes to the progression and poor prognosis of COVID-19. *Nutrition, Metabolism and Cardiovascular Diseases*.
46. Li, Y., Hu, Y., Yu, J. et al. Retrospective analysis of laboratory testing in 54 patients with severe- or critical-type 2019 novel coronavirus pneumonia. *Lab Invest* (2020).

47. Li, Y., Peng, S., Li, L. et al. Clinical and Transmission Characteristics of Covid-19 — A Retrospective Study of 25 Cases from a Single Thoracic Surgery Department. *CURR MED SCI* 40, 295–300 (2020). <https://doi.org/10.1007/s11596-020-2176-2>
48. Li, T., Zhang, Y., Gong, C. et al. Prevalence of malnutrition and analysis of related factors in elderly patients with COVID-19 in Wuhan, China. *Eur J Clin Nutr* (2020).
49. Liu, J., Li, S., Liu, J., Liang, B., Wang, X., Wang, H., ... & Xiong, L. (2020). Longitudinal characteristics of lymphocyte responses and cytokine profiles in the peripheral blood of SARS-CoV-2 infected patients. *EBioMedicine*, 102763.
50. Sun, S., Cai, X., Wang, H., He, G., Lin, Y., Lu, B., ... & Hu, X. (2020). Abnormalities of peripheral blood system in patients with COVID-19 in Wenzhou, China. *Clinica Chimica Acta*.
51. Sun, Y., Dong, Y., Wang, L., Xie, H., Li, B., Chang, C., & Wang, F. S. (2020). Characteristics and prognostic factors of disease severity in patients with COVID-19: The Beijing experience. *Journal of Autoimmunity*, 102473.
52. Piva, S., Filippini, M., Turla, F., Cattaneo, S., Margola, A., De Fulviis, S., ... & Erbici, G. (2020). Clinical presentation and initial management critically ill patients with severe acute respiratory syndrome coronavirus 2 (SARS-CoV-2) infection in Brescia, Italy. *Journal of Critical Care*.
53. Meng, Y., Wu, P., Lu, W., Liu, K., Ma, K., Huang, L., ... & Ding, W. (2020). Sex-specific clinical characteristics and prognosis of coronavirus disease-19 infection in Wuhan, China: A retrospective study of 168 severe patients. *PLoS pathogens*, 16(4), e1008520.
54. Yanli Liu, Wenwu Sun, Yanan Guo, Liangkai Chen, Lijuan Zhang, Su Zhao, Ding Long & Li Yu (2020) Association between platelet parameters and mortality in coronavirus disease 2019: Retrospective cohort study, Platelets, DOI: 10.1080/09537104.2020.1754383
55. Zhou, Y., Han, T., Chen, J., Hou, C., Hua, L., He, S., ... & Zhao, C. (2020). Clinical and Autoimmune Characteristics of Severe and Critical Cases with COVID-19. *Clinical and Translational Science*.
56. Richardson, S., Hirsch, J. S., Narasimhan, M., Crawford, J. M., McGinn, T., Davidson, K. W., ... & Cookingham, J. (2020). Presenting characteristics, comorbidities, and outcomes among 5700 patients hospitalized with COVID-19 in the New York City area. *Jama*.

## eAppendix 1. Detailed search strategies used in this review

May 5<sup>th</sup> 2020

|                       | Before deduplication | After deduplication* |
|-----------------------|----------------------|----------------------|
| Embase.com            | 654                  | 652                  |
| PubMed                | 699                  | 312                  |
| Medline Ovid          | 589                  | 45                   |
| Cochrane Trials       | 18                   | 18                   |
| Web-of-Science        | 222                  | 118                  |
| Google Scholar**      | 200                  | 146                  |
| WHO Covid-19 Database | 48                   | 11                   |
| <b>Total</b>          | <b>2430</b>          | <b>1302</b>          |

\*1128 duplicate records have been removed

\*\*Google Scholar: first 1500 according to relevance ranking

Other sources: searching bibliographies of core articles, forward citation tracking (Web of Science, Google scholar).

**Limits:** excluding animal studies.

### Embase.com

('covid 19'/exp OR 'coronavirus disease 2019'/exp OR 'Middle East respiratory syndrome coronavirus'/exp OR 'severe acute respiratory syndrome coronavirus 2'/exp OR 'SARS-related coronavirus'/exp OR 'coronaviridae'/de OR 'coronavirinae'/exp OR 'coronavirus infection'/exp OR (coronavir\* OR corona virus\* OR covid OR nCoV OR '2019-novel Cov' OR 'pneumonia virus\*' OR 'Severe Acute Respiratory Syndrome\*' OR SARS OR 'Middle East Respiratory Syndrome\*' OR MERS):ab,ti,kw) AND ('iron deficiency'/exp OR 'anemia'/exp OR 'transferrin'/de OR 'ferritin'/de OR 'iron binding protein'/exp OR 'erythropoietin'/de OR 'soluble transferrin receptor'/de OR 'hepcidin'/de OR 'haptoglobin'/de OR 'unsaturated iron binding capacity'/de OR 'erythrocyte'/exp OR 'erythrocyte protoporphyrin'/de OR 'erythrocyte parameters'/exp OR 'hematocrit'/de OR 'hemoglobin'/exp OR 'hemoglobin blood level'/de OR 'risk factor'/de OR 'clinical feature'/de OR (anemi\* OR anaemi\* OR iron OR 'red blood cell\*' OR haematocrit OR hematocrit OR transferrin\* OR serotransferrin\* OR siderophilin OR isotransferrin\* OR apoferritin OR ferritin\* OR isoferritin\* OR immunoferritin\* OR mycoferritin\* OR proteoferrin\* OR sanifer OR unifer OR erythropoieti\* OR hematopoie\* OR hemopoie\* OR haematopoie\* OR haemopoie\* OR hepcidin\* OR haptoglobin\* OR UIBC OR (('free erythrocyte' OR normocyte OR 'red blood cell' OR 'red cell') NEAR/2 (protoporphyrin\*)) OR erythrocyte\* OR hemoglobin\* OR haemoglobin\* OR hemoglobulin\* OR haemoglobulin\* OR ferrohaemoglobin\* OR ferrohemoglobin\* OR 'risk factor\*' OR ((clinical) NEAR/3

(characteristic\* OR feature\* OR predictor\*)):ab,ti,kw) NOT ([animals]/lim NOT [humans]/lim) NOT ([Conference Abstract]/lim OR [Letter]/lim OR [Note]/lim OR [Editorial]/lim) AND [2019-3000]/py

## PubMed

("Coronavirus"[Mesh] OR "Coronavirus Infections"[Mesh] OR "COVID-19" [Supplementary Concept] OR coronavir\*[tiab] OR "corona virus\*" [tiab] OR covid[tiab] OR nCoV[tiab] OR 2019-novel Cov OR pneumonia virus\* OR "Severe Acute Respiratory Syndrome\*" [tiab] OR SARS[tiab] OR "Middle East Respiratory Syndrome\*" [tiab] OR MERS[tiab]) AND ("Anemia"[Mesh] OR "Transferrin"[Mesh] OR "Ferritins"[Mesh] OR "Erythropoietin"[Mesh] OR "Receptors, Transferrin"[Mesh] OR "Hepcidins"[Mesh] OR "Haptoglobins"[Mesh] OR "Erythrocytes"[Mesh] OR "Iron-Binding Proteins"[Mesh] OR "Hematocrit"[Mesh] OR "Hemoglobins"[Mesh] OR "Risk Factors"[Mesh] OR anemi\*[tiab] OR anaemi\*[tiab] OR iron[tiab] OR red blood cell\*[tiab] OR haematocrit OR hematocrit OR transferrin\*[tiab] OR serotransferrin\*[tiab] OR siderophilin\*[tiab] OR isotransferrin\*[tiab] OR apoferritin\*[tiab] OR ferritin\*[tiab] OR isoferritin\*[tiab] OR immunoferritin\* OR mycoferritin\* OR proteoferrin\* OR sanifer OR unifer OR erythropoie\*[tiab] OR hematopoie\*[tiab] OR hemopoie\*[tiab] OR haematopoie\*[tiab] OR haemopoie\*[tiab] OR hepcidin\*[tiab] OR haptoglobin\*[tiab] OR UIBC[tiab] OR (("free erythrocyte"[tiab] OR normocyte[tiab] OR "red blood cell" [tiab] OR "red cell" [tiab])) AND (protoporphyrin\*[tiab])) OR erythrocyte\*[tiab] OR hemoglobin\*[tiab] OR haemoglobin\*[tiab] OR hemoglobulin\*[tiab] OR haemoglobulin\*[tiab] OR ferrohaemoglobin\*[tiab] OR ferrohemoglobin\*[tiab] OR "risk factor\*" [tiab] OR ((clinical[tiab]) AND (characteristic\*[tiab] OR feature\*[tiab] OR predictor\*[tiab]))) NOT (animals[mh] NOT humans[mh]) NOT (letter[pt] OR news[pt] OR comment[pt] OR editorial[pt] OR congresses[pt] OR abstracts[pt]) AND 2019 : 3000 [dp]

[dp] = Publication date

## Medline Ovid

(\*Covid-19 Expert Search limit for Ovid MEDLINE) AND (exp anemia/ OR transferrin/ OR exp ferritins/ OR exp erythropoietin/ OR exp Receptors, Transferrin/ OR hepcidins/ OR haptoglobins/ OR unsaturated iron binding capacity/ OR exp erythrocytes/ OR exp Iron-Binding Proteins/ OR Hematocrit/ OR exp hemoglobins/ OR risk factors/ OR (anemi\* OR anaemi\* OR iron OR red blood cell\* OR haematocrit OR haematocrit OR transferrin\* OR serotransferrin\* OR siderophilin OR isotransferrin\* OR apoferritin OR ferritin\* OR isoferritin\* OR immunoferritin\* OR mycoferritin\* OR proteoferrin\* OR sanifer OR unifer OR erythropoie\* OR hematopoie\* OR hemopoie\* OR haematopoie\* OR haemopoie\* OR hepcidin\* OR haptoglobin\* OR UIBC OR ((free erythrocyte OR normocyte OR red blood cell OR red cell) ADJ2 (protoporphyrin\*)) OR erythrocyte\* OR hemoglobin\* OR haemoglobin\* OR hemoglobulin\* OR haemoglobulin\* OR ferrohaemoglobin\* OR ferrohemoglobin\* OR risk factor\* OR ((clinical) ADJ3 (characteristic\* OR feature\* OR predictor\*))).ab,ti,kw) NOT (exp animals/ NOT humans/) NOT (letter OR news OR comment\* OR editorial\* OR congres\* OR abstract\*).pt.

\*<http://tools.ovid.com/coronavirus> : Wolters Kluwer, Expert Search Strategies COVID-19,

Ovid MEDLINE(R) All 1946 to present

**Cochrane Central Register of Controlled Trials** (Issue 5 of 12, May 2020)

((coronavir\* OR corona NEXT virus\* OR covid OR nCoV OR "2019-novel Cov" OR "pneumonia virus" OR "Severe Acute Respiratory Syndrome" OR SARS OR "Middle East Respiratory Syndrome" OR MERS):ab,ti,kw) AND ((anemi\* OR anaemi\* OR iron OR red-blood-cell\* OR haematocrit OR haematocrit OR transferrin\* OR serotransferrin\* OR siderophilin OR isotransferrin\* OR apoferritin OR ferritin\* OR isoferritin\* OR immunoferritin\* OR mycoferritin\* OR proteoferrin\* OR sanifer OR unifer OR erythropoie\* OR hematopoie\* OR hemopoie\* OR haematopoie\* OR haemopoie\* OR hepcidin\* OR haptoglobin\* OR UIBC OR ("free erythrocyte" OR normocyte OR "red blood cell" OR "red cell") NEAR/2 (protoporphyrin\*)) OR erythrocyte\* OR hemoglobin\* OR haemoglobin\* OR hemoglobulin\* OR haemoglobulin\* OR ferrohaemoglobin\* OR ferrohemin\* OR risk NEXT factor\* OR ((clinical) NEAR/3 (characteristic\* OR feature\* OR predictor\*)):ab,ti,kw)

Date range: 2019-2020

**Web of Science Core Collection**

TS=(((coronavir\* OR "corona virus\*" OR covid OR nCoV OR "2019-novel Cov" OR "pneumonia virus\*" OR "Severe Acute Respiratory Syndrome" OR SARS OR "Middle East Respiratory Syndrome" OR MERS)) AND ((anemi\* OR anaemi\* OR iron OR "red blood cell\*" OR haematocrit OR hematocrit OR transferrin OR transferrins OR serotransferrin\* OR siderophilin OR isotransferrin\* OR apoferritin OR ferritin\* OR isoferritin\* OR immunoferritin\* OR mycoferritin\* OR proteoferrin\* OR sanifer OR unifer OR erythropoie\* OR hematopoie\* OR hemopoie\* OR haematopoie\* OR haemopoie\* OR hepcidin\* OR haptoglobin\* OR UIBC OR ("free erythrocyte" OR normocyte OR "red blood cell" OR "red cell") NEAR/2 (protoporphyrin\*)) OR erythrocyte\* OR hemoglobin\* OR haemoglobin\* OR hemoglobulin\* OR haemoglobulin\* OR ferrohaemoglobin\* OR ferrohemin\* OR "risk factor\*" OR ((clinical) NEAR/3 (characteristic\* OR feature\* OR predictor\*)))) AND DT=(article)

PUBLICATION YEARS: ( 2020 OR 2019 )

**Google scholar** first 200 results

covid|coronavirus|sars|cov  
anemia|anaemia|transferrin|ferritin|iron|erythropoietin|hemoglobin|haemoglobin|erythrocyte|erythrocytes|hepcidin|haptoglobin

---
